# Supplementary material for: Adolescent medicine training in postgraduate family medicine education: a scoping review
Source: publisher site journal article supplement (doi:10.1515/ijamh-2022-0087), 2022-12-30
Supplement: Supplementary file 1 [file j_ijamh-2022-0087_suppl.docx]

**Appendix 1- Search Strategy**

**Literature Search**

Document updated: Date: September 15, 2020 by Genevieve Gore

Database searches conducted: Date: September 15, 2020 by Genevieve Gore

Database searches peer reviewed: Date: September 14, 2020 by Jill Boruff

| Platform | Database(s) | Database coverage dates | # Results | Search Date |
| --- | --- | --- | --- | --- |
| OvidSP | Ovid MEDLINE ALL(R) | 1946 - | 498 | 2020/09/15 |
| OvidSP | EMBASE Classic + EMBASE | 1947 - | 393 | 2020/09/15 |
| OvidSP | PsycINFO | 1806 - | 132 | 2020/09/15 |
| Web of Science | SCI-EXP, CPCI-S, ESCI | 1900 - | 112 | 2020/09/15 |
| EBSCOhost | CINAHL | 1937 - | 137 | 2020/09/14 |
| EBSCOhost | ERIC | Inception - | 1 | 2020/09/14 |
| ProQuest | ProQuest Theses and Dissertations Global | Inception - | 44 | 2020/10/21 |
|  |  |  |  |  |
|  | **TOTAL NUMBER OF RECORDS** |  | 1317 |  |

**Limits applied to all:** English, French, Spanish

**Number of records identified through database searching: 498 + 393 + 132 + 122 + 137 + 1 + 44 = 1317 Records**

**Original searches:**

Database: Ovid MEDLINE(R) ALL <1946 to September 14, 2020>

Search Strategy:

--------------------------------------------------------------------------------

1 exp adolescent health/ or exp adolescent health services/ or Adolescent Medicine/ or exp adolescent/ or exp young adult/ or (adolescen* or developmental medicine or minor$1 or pubescen* or puberty or teen* or youth or young adult*).ti,ab,kf. (2787901)

2 general practitioners/ or physicians, family/ or exp General Practice/ or (family medicine or family physician* or family doctor* or family practi* or general physician* or general medicine or general medical practi* or general practi*).ti,ab,kf. (158772)

3 "Internship and Residency"/ or (fellow$1 or resident$1 or intern$1 or registrar* or trainee*).ti,ab,kf. (226617)

4 exp medical education, graduate/ or exp curriculum/ or (curricul* or fellowship* or internship* or residenc$3 or medical education or training).ti,ab,kf. (618883)

5 1 and 2 and 3 and 4 (518)

6 limit 5 to (english or french or spanish) (498)

***************************

Database: Embase Classic+Embase <1947 to 2020 September 14>

Search Strategy:

--------------------------------------------------------------------------------

1 adolescent health/ or adolescent disease/ or exp adolescence/ or exp adolescent/ or young adult/ or (adolescen* or developmental medicine or minor$1 or pubescen* or puberty or teen* or youth or young adult*).ti,ab,kw. (2428085)

2 general practitioner/ or exp General Practice/ or (family medicine or family physician* or family doctor* or family practi* or general physician* or general medicine or general medical practi* or general practi*).ti,ab,kw. (235787)

3 resident/ or (fellow$1 or resident$1 or intern$1 or registrar* or trainee*).ti,ab,kw. (290552)

4 exp medical education/ or curriculum/ or (curricul* or fellowship* or internship* or residenc$3 or medical education or training).ti,ab,kw. (968242)

5 1 and 2 and 3 and 4 (407)

6 limit 5 to (english or french or spanish) (393)

***************************

Database: APA PsycInfo <1806 to September Week 1 2020>

Search Strategy:

--------------------------------------------------------------------------------

1 exp adolescent development/ or ("200" or "320").ag. or (adolescen* or developmental medicine or minor$1 or pubescen* or puberty or teen* or youth or young adult*).ti,ab. (962100)

2 general practitioners/ or family physicians/ or family medicine/ or (family medicine or family physician* or family doctor* or family practi* or general physician* or general medicine or general medical practi* or general practi*).ti,ab. (22711)

3 (fellow$1 or resident$1 or intern$1 or registrar* or trainee*).ti,ab. (71236)

4 exp medical education/ or exp postgraduate training/ or curriculum/ or curriculum development/ or (curricul* or fellowship* or internship* or residenc$3 or medical education or training).ti,ab. (348505)

5 1 and 2 and 3 and 4 (135)

6 limit 5 to (english or french or spanish) (132)

***************************

SCI-EXPANDED, CPCI-S, ESCI (Web of Science)

(TS=(adolescen* OR "developmental medicine" OR minor$ OR pubescen* OR puberty OR teen* OR youth OR "young adult*") AND TS=("family medicine" OR "family physician*" OR "family doctor*" OR "family practi*" OR "general physician*" OR "general medicine" OR "general medical practi*" OR "general practi*") AND TS=(fellow$ OR resident$ OR intern$ OR registrar* OR trainee*) AND TS=(curricul* OR fellowship* OR internship* OR residenc* OR "medical education" OR training)) *AND***LANGUAGE:** (English OR French OR Spanish)

*Indexes=SCI-EXPANDED, CPCI-S, ESCI Timespan=All years*

112 records on September 15, 2020

CINAHL (EBSCOhost)

|  | Tuesday, September 15, 2020 9:46:07 AM |
| --- | --- |

| **#** | **Query** | **Limiters/Expanders** | **Last Run Via** | **Results** |
| --- | --- | --- | --- | --- |
| S22 | S20 AND S21 | Expanders - Apply equivalent subjects Search modes - Boolean/Phrase | Interface - EBSCOhost Research Databases Search Screen - Advanced Search Database - CINAHL Plus with Full Text | 137 |
| S21 | LA english OR french OR spanish | Expanders - Apply equivalent subjects Search modes - Boolean/Phrase | Interface - EBSCOhost Research Databases Search Screen - Advanced Search Database - CINAHL Plus with Full Text | 7,297,869 |
| S20 | S6 AND S14 AND S19 | Expanders - Apply equivalent subjects Search modes - Boolean/Phrase | Interface - EBSCOhost Research Databases Search Screen - Advanced Search Database - CINAHL Plus with Full Text | 137 |
| S19 | S15 OR S16 OR S17 OR S18 | Expanders - Apply equivalent subjects Search modes - Boolean/Phrase | Interface - EBSCOhost Research Databases Search Screen - Advanced Search Database - CINAHL Plus with Full Text | 309,981 |
| S18 | (curricul* OR fellowship* OR internship* OR residency OR residencies OR medical education OR training) | Expanders - Apply equivalent subjects Search modes - Boolean/Phrase | Interface - EBSCOhost Research Databases Search Screen - Advanced Search Database - CINAHL Plus with Full Text | 296,010 |
| S17 | (MH "Curriculum+") OR (MH "Curriculum Development") OR (MH "Course Content") | Expanders - Apply equivalent subjects Search modes - Boolean/Phrase | Interface - EBSCOhost Research Databases Search Screen - Advanced Search Database - CINAHL Plus with Full Text | 40,894 |
| S16 | (MH "Internship and Residency") | Expanders - Apply equivalent subjects Search modes - Boolean/Phrase | Interface - EBSCOhost Research Databases Search Screen - Advanced Search Database - CINAHL Plus with Full Text | 17,162 |
| S15 | (MH "Education, Medical+") | Expanders - Apply equivalent subjects Search modes - Boolean/Phrase | Interface - EBSCOhost Research Databases Search Screen - Advanced Search Database - CINAHL Plus with Full Text | 37,988 |
| S14 | S10 AND S13 | Expanders - Apply equivalent subjects Search modes - Boolean/Phrase | Interface - EBSCOhost Research Databases Search Screen - Advanced Search Database - CINAHL Plus with Full Text | 4,448 |
| S13 | S11 OR S12 | Expanders - Apply equivalent subjects Search modes - Boolean/Phrase | Interface - EBSCOhost Research Databases Search Screen - Advanced Search Database - CINAHL Plus with Full Text | 82,797 |
| S12 | (fellow# OR resident# OR intern# OR registrar* OR trainee*) | Expanders - Apply equivalent subjects Search modes - Boolean/Phrase | Interface - EBSCOhost Research Databases Search Screen - Advanced Search Database - CINAHL Plus with Full Text | 82,797 |
| S11 | (MH "Interns and Residents") | Expanders - Apply equivalent subjects Search modes - Boolean/Phrase | Interface - EBSCOhost Research Databases Search Screen - Advanced Search Database - CINAHL Plus with Full Text | 8,366 |
| S10 | S7 OR S8 OR S9 | Expanders - Apply equivalent subjects Search modes - Boolean/Phrase | Interface - EBSCOhost Research Databases Search Screen - Advanced Search Database - CINAHL Plus with Full Text | 75,190 |
| S9 | (family medicine or family physician* or family doctor* or family practi* or general physician* or general medicine or general medical practi* or general practi*) | Expanders - Apply equivalent subjects Search modes - Boolean/Phrase | Interface - EBSCOhost Research Databases Search Screen - Advanced Search Database - CINAHL Plus with Full Text | 69,868 |
| S8 | (MH "Family Practice") | Expanders - Apply equivalent subjects Search modes - Boolean/Phrase | Interface - EBSCOhost Research Databases Search Screen - Advanced Search Database - CINAHL Plus with Full Text | 25,125 |
| S7 | (MH "Physicians, Family") | Expanders - Apply equivalent subjects Search modes - Boolean/Phrase | Interface - EBSCOhost Research Databases Search Screen - Advanced Search Database - CINAHL Plus with Full Text | 19,882 |
| S6 | S1 OR S2 OR S3 OR S4 OR S5 | Expanders - Apply equivalent subjects Search modes - Boolean/Phrase | Interface - EBSCOhost Research Databases Search Screen - Advanced Search Database - CINAHL Plus with Full Text | 722,576 |
| S5 | (adolescen* OR developmental medicine OR minor# or pubescen* OR puberty OR teen* OR youth OR young adult*) | Expanders - Apply equivalent subjects Search modes - Boolean/Phrase | Interface - EBSCOhost Research Databases Search Screen - Advanced Search Database - CINAHL Plus with Full Text | 722,576 |
| S4 | (MH "Adolescence+") OR (MH "Young Adult") | Expanders - Apply equivalent subjects Search modes - Boolean/Phrase | Interface - EBSCOhost Research Databases Search Screen - Advanced Search Database - CINAHL Plus with Full Text | 638,147 |
| S3 | (MH "Society for Adolescent Medicine") | Expanders - Apply equivalent subjects Search modes - Boolean/Phrase | Interface - EBSCOhost Research Databases Search Screen - Advanced Search Database - CINAHL Plus with Full Text | 78 |
| S2 | (MH "Adolescent Medicine") | Expanders - Apply equivalent subjects Search modes - Boolean/Phrase | Interface - EBSCOhost Research Databases Search Screen - Advanced Search Database - CINAHL Plus with Full Text | 364 |
| S1 | (MH "Adolescent Health") OR (MH "Adolescent Health Services") | Expanders - Apply equivalent subjects Search modes - Boolean/Phrase | Interface - EBSCOhost Research Databases Search Screen - Advanced Search Database - CINAHL Plus with Full Text | 10,388 |

ERIC (EBSCOhost)

( ((adolescen* OR "developmental medicine" OR teen* OR youth OR "young adult*") AND ("family medicine" OR "family physician*" OR "family doctor*" OR "family practi*" OR "general physician*" OR "general medicine" OR "general medical practi*" OR "general practi*") AND (fellow# OR resident# OR intern# OR registrar* OR trainee*) AND (curricul* OR fellowship* OR internship* OR residency OR residencies OR "medical education" OR training)) ) AND LA ( english OR french OR spanish )

1 record on September 15, 2020

ProQuest Theses & Dissertations Global (ProQuest)

(NOFT(adolescen* OR "developmental medicine" OR minor OR minors OR pubescen* OR puberty OR teen* OR youth OR "young adult*") AND ("family medicine" OR "family physician*" OR "family doctor*" OR "family practi*" OR "general physician*" OR "general medicine" OR "general medical practi*" OR "general practi*") AND NOFT(fellow OR fellows OR resident OR residents OR intern OR interns OR registrar OR registrars OR trainee OR trainees) AND NOFT(curricul* OR fellowship* OR internship* OR residenc* OR "medical education" OR training))

44 records on October 21, 2020

**Appendix 2- Grey Literature Search**

| **Documents** | **Reviewer 1** | **Reviewer 2** |
| --- | --- | --- |
| DIRECTIONS FOR RESIDENCY EDUCATION, 2009 | Exclude | Exclude |
| Medical Workforce Knowledge base Data Dashboard | Exclude | Exclude |
| College of Family Physicians- Section of communities of practice in family | Exclude | Exclude |
| American academic of pediatrics bioethics | Exclude | Exclude |
| American Academy of Pediatrics- Resident concern and experiences | exclude | exclude |
| AAFP Core educational guidelines adolescent | Include | Include |
| Family Medicine for America’s Health_ Entrustable Professional Activities for Family Medicine End of Residency Training. Additional info found here: <https://www.afmrd.org/page/epa> | Exclude | Exclude |
| Recommended Curriculum Guidelines for Family Medicine Residents Adolescent Health | Include | Include |
| A Framework for the Integration of Adolescent Health and Development Concepts Into Pre-service Health Professional Educational Curricula WHO Western Pacific Region | Exclude | Exclude |
| WHO Core competencies in adolescent | Include | Include |
| The Republic of Moldova’s addressing of adolescent health and development in state medical university curricula | Exclude | exclude |
| **RACFP** |  |  |
| Curriculum for Australian general practice | Include | Include |
| Paediatric Term Requirements | exclude | exclude |
| EuTeach: https://www.unil.ch/euteach/home/menuinst/what-to-teach/euteach-modules-1.html | Include | Include |
| University of Toronto: https://www.dfcm.utoronto.ca/enhanced-skills-program-self-directed-pgy3 | Exclude | exclude |
| University of Toronto: https://www.dfcm.utoronto.ca/enhanced-skills-program-addiction-medicine | Exclude | Exclude |
| Society for Adolescent Health and Medicine: Adolescent Medicine Resident Curriculum  https://www.adolescenthealth.org/Training-and-CME/Adolescent-Medicine-Resident-Curriculum.aspx | Include | Include |

**Appendix 3- Data extraction sheet**

| Author |  |
| --- | --- |
| Do the authors represent an accreditation organization |  |
| - If yes – which one? |  |
| Year of publication |  |
| Geography |  |
| Type of article (conceptual, empirical, position paper, editorial) |  |
| Study Topic (e.g., contraceptive) |  |
| Study Objective/purpose |  |
| Study design/Methodology (Quan, Qual, mixed-methods, Review or N/A) |  |
| Sample Population (n=) |  |
| Sample population. FMED (n=) |  |
| Residency training level |  |
| Authors results/main conclusion |  |
| Study Limitation |  |
| Areas for future research |  |
| Areas for future training |  |
| Q1) What adolescent health competency is being taught (or researched)? |  |
| Does the article implicitly mention a competency? |  |
| Does the article explicitly link back a competency framework (e.g. ACGME, CanMEDS)? |  |
| Q2) Does the authors state if the competency is considered required for residency graduation? |  |

**Appendix 4**- Number of papers published per years


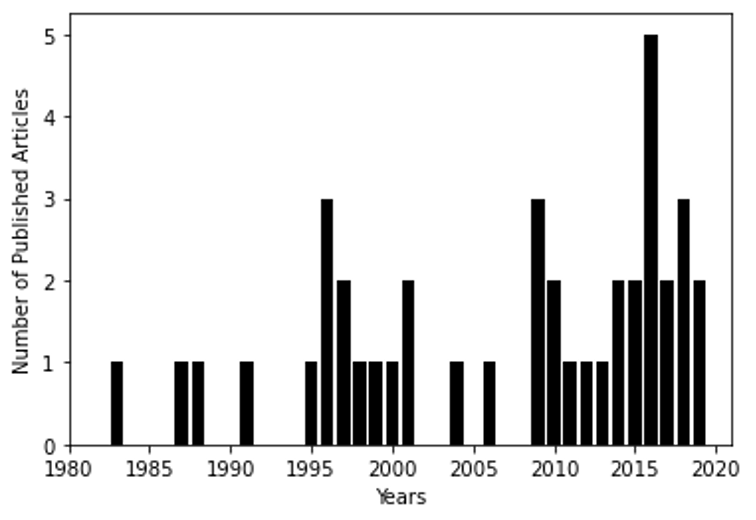


**Appendix 5-Individual topics from academic literature**

| CanMEDS-FM | Category | Specific Topic |
| --- | --- | --- |
| **Communicator** | Communication with others and colleagues | Managing child abuse cases. identification, reporting, and referring abused patients to specialists. |
| Identification, reporting, and referring abused patients to specialists. |
| Communication with patients | Delivering HPV vaccine recommendations/education to adolescents and their parents |
| Communication about chronic disease self-management |
| Communication about mental health issues |
| Patient communication |
| Contraceptive counselling |
| Communication about eating disorders |
| Counselling family about child’s development (normal and abnormal) |
| **Family Medicine Expert** | Knowledge, assessment and management of acute and chronic medical health issues | Understanding and screening of population health |
| Preventative health |
| Family planning |
| General medical conditions |
| General physical assessment |
| Adolescent hypertension |
| Gynecological examination   - Prepubertal vaginal bleeding - Prepubertal vulvovaginitis - Prepubertal examination - Precocious puberty - Delayed puberty |
| Interpret laboratory values |
| Nutrition |
| Immunization |
| Injury prevention |
| Reproductive health |
| Genital abnormalities |
| Substance abuse |
| Sexual orientation |
| Sexuality |
| Sexually transmitted diseases |
| HIV/AIDS |
| Alcohol |
| Stress |
| Exercise |
| High-risk behaviors |
| Core skills of transition and transfer |
| Chronic conditions in adolescent |
| Adolescent reproductive health |
| Developmental issues |
| Recognition and management of child maltreatment |
| Eligibility criteria for contraceptives |
| Contraceptive options |
| Long-acting reversible contraceptives |
| IUD insertion and removal |
| Knowledge of IUD guidelines |
| Birth control |
| Correct use of condoms |
| Options for pregnancy termination |
| Child-rearing principles |
| Normal growth and development |
| Development delays and disorders |
| Disruptive behavior disorders |
| Manage child’s disruptive behaviour |
| Detect dysfunctional eating/feeding |
| Manage common mood/anxiety disorders |
| Certifying an asymptomatic HIV child |
| Body image |
| Knowledge of Mental health issues | Knowledge of adolescent psychiatric disorder |
| Psychopharmacologic agents |
| Suicidal risk |
| Self-harm |
| Assessment and management of Mental health issues | Assessment and management of adolescent mental health issues |
| Physical illness and psychological factors |
| Assess suicidal risk |
| Depression |
| Peer-pressure |
| Unspecified | Health Promotion |
| Career choice |
| LGBTQ adolescent biological, psychological and social issues |
| Child abuse |
| **Professional** | Ethics | Navigate confidentiality |
| Disclosure |
| Confidentiality about HIV/AIDS |
| Team collaboration |
| Legal duty to report suspect child maltreatment |
| Navigate Medicare |
| **Collaborator** | Collaborating with other health care providers | Teach skills for engaging adolescent/patient education and counselling |
| Working with health care teams |
| **Scholar** | N/A | N/A |
| **Leader** | N/A | Group activity (HIV/AIDS) |
| **Health Advocate** | N/A | Community-based adolescent health education |
| Sexual health counseling |

**Appendix 6- All competencies from grey literature**

|  | Knowledge | Skills | Attitudes | Behaviour |
| --- | --- | --- | --- | --- |
| **CanMEDS Role** | **Objectives/Competencies** | **Objectives/Competencies** | **Objectives/Competencies** | **Objectives/Competencies** |
|  |
| Medical Expert (n=61) | Anticipatory guidance for parents | optimize treatment plans using local adolescent health resources | Adolescent sexuality, including physical, psychosocial, moral, heterosexual, homosexual, bisexualand gender identity issues | use risk assessment screening tools |  |
| Normal anatomy and physiology associated with puberty and the adolescent year | assess risks and benefits of adolescent's social media presence | preoccupation of adolescent with their bodies | The issues of confidentiality in the physician-adolescent patient interaction |  |
| Variations in physical growth and development | Demonstrate an understanding of normal adolescent development, its impact on health and its implications for health care and health promotion - Identify maturation/development stage of the adolescent | Effects of peer pressure and peer support | provide culturally sensitive care - Cultural competence and humility |  |
| Tasks and stages of adolescence - Psychological growth and development in each stage - Social and cognitive development | Collect patient history, including risk factors and strengths/ resources  Screening (psychological and behavioral health)  Complete physical exam and focused adolescent exam - Assess blood pressure - Assess wellbeing at home - Assess, counsel and refer for adverse childhood experiences - Assess progress at school - Assess peer relationships and provide counsel  - Assess alcohol and drug use - Assess and counsel on use of supplements - Assess sexual behaviours and counsel on safe practices (including contraceptives) - Assess, counsel and refer for mental health issues - Assess and counsel on stressors - Assess and counsel on accident and safety risks - Assess for screen time and social media presence - Assess for employment - Assess for safety from violence, abuse or self-abuse | Core conditions such as family problems, poverty, depression etc. - Adolescents inquisitive and confrontational attitudes toward society, parents and others | Provide care that is informed and innovative |  |
| The adolescent athlete - preparticipation screen (sports medicine) - common injuries (sports medicine) - Female athlete triad and relative energy deficiency | Identify patterns of family functioning |  | Provide first point of care that is patient-centred and holistic |  |
| School screening examninations | Evaluate for sports eligibiility |  | recognition of patient's individual strengths aiding their development |  |
| Preventive health care - Prevention of risk-taking behavior | Interpret BMI and make lifestyle recommendations (including related to eating disorders and body image) |  | Manage common health conditions during adolescence - Provide HIV prevention, detection, management andcare services - Manage chronic health conditions including disability - Assess nutritional status and manage nutrition-related disorders  - Assess and manage substance use and substanceuse disorders - Prevent and manage unintended injuries - Detect and manage endemic diseases |  |
| Major threats to life and health in adolescence | Discuss sexual health, orientation and gender identity |  | The adolescent sense of invulnerability and the tendency toward high-risk behavior |  |
| Specific programs adolescents | Teach skills for building and expressing self-esteem |  | Promote physical activity |  |
| Modifiers of social development (Gender, Social status, Culture, Family factors, Sexual orientation) - Sexual and Gender minority Youth | select screening services appropriate to ambulatory setting - describe 'teen friendly' ambulatory clinic |  | Challenges facing an adolescent to establish his or her identity and to learn responsible behaviors |  |
| Describe common parenting styles | apply epidemiological data to develop programs with community involvement |  |  |  |
| Describe basic principles of motivational interviewing - Positive Youth Development and Motivational Interviewing | Performance of special procedures and interpretation of results |  |  |  |
| Describe skin diseases, orthopedic diseases, functional disorders, abnormal sleep patterns, and chronic fatigue syndrome common in adolescence | Formulating a plan of management, investigation and further consultation, if appropriate -Incorporate resilience theory into counseling an individual adolescent - Referral/treatment (psychological and behavioral health) |  |  |  |
| Understand the impact of skin disease on an adolescent’s feeling of wellbeing" | Assess and counsel pregnant adolescents comprehensively, and refer them to other providers as necessary - Pregnancy options counselling |  |  |  |
| Describe common chronic conditions | Demonstrate skill in bringing out underlying concerns (hidden agenda) of an adolescent patient |  |  |  |
| Describe common eating disorders - Eating disorders | elicit and explore the perception and experience with skin diseases, orthopedic diseases, functional disorders, abnormal sleep patterns, and chronic fatigue syndrome |  |  |  |
| Describe common mental health issues | Management of suicidality |  |  |  |
| "Describe proper nutrition and lifestyle for adolescent wellbeing - Overweight/obesity" |  |  |  |  |
| Describe positives and negatives of social media |  |  |  |  |
| Social determinants of health |  |  |  |  |
| "Pregnancy options counselling - abortion" |  |  |  |  |
| Male reproductive health |  |  |  |  |
| Sexually Transmitted infections |  |  |  |  |
| Menstrual cycle and common menstrual disorders |  |  |  |  |
| Community resources (substance use and abuse) |  |  |  |  |
| injury prevention (safety and violence) - phsical violence and prevention - intimate partner violence (IPV) and sexual assault |  |  |  |  |
| Juvenile justice |  |  |  |  |
| Bullying and cyberbullying |  |  |  |  |
| - well teens (transition to adult care)  - chronic illness (transition to adult care) |  |  |  |  |
| Harm Reduction |  |  |  |  |
| Communicator (n=9) | culturally appropriate, patient centred treatment plans - Anticipatory guidance for parents | Establish clinical rapport | professional is self-aware | coordinate/lead/collaborate on healthcare teams |  |
| Communication preferences of adolescents - patient education information that is specifically intended for adolescent | communicate effectively and maintain confidentiality |  | communicate effectively and maintain confidentiality |  |
|  | Respond to parental questions and concerns - Determining patient's parental relationship during interview and physical examination - Dealing with adolescents in the context of their family and community (i.e., awareness of their interactions with parents, siblings, peers, teachers, etc.) - Demonstrate a nonjudgmental, autonomy supporting approach toward the adolescent |  | Effectively interact with an adolescent client |  |
| Collaborator (n=3) | **None** | Coordinate the care of at-risk youth | Interpersonal relationships with an open-minded attitude toward adolescent patients | coordinate/lead/collaborate on healthcare teams |  |
| Leader (n=9) | adolescent health care- health evaluation | design appropriate preventative services for ambulatory setting - design QI to monitor adolescent services | **None** | coordinate/lead/collaborate on healthcare teams |  |
| School screening examninations | implement programs in collaboration with key stakeholders Promote educational programs in schools - Promote quality adolescent health services in schools Promote the support of adolescent clinical services in communities |  | mentors and teaches to improve quality of care |  |
|  | Coordinate the care of at-risk youth |  | use quality management processes and systems to optimize safety |  |
|  | disseminate information |  |  |  |
| Health Advocate (n=8) | School screening examninations | design appropriate preventative services for ambulatory setting | The promotion of health, wellness and prevention habits | advocate for adolescents at various system levels   - provide health education that empowers patients  - recognition of community network aiding their development |  |
|  | implement programs in collaboration with key stakeholders  Promote educational programs in schools - Promote quality adolescent health services in schools  Promote the support of adolescent clinical services in communities | understand adolescence as a time of exploration | promote wellbeing at public health level |  |
|  |  | Strategies for providing preventive services, immunizations, health promotion, and guidance |  |  |
| Scholar (n=5) | Understand biases and personal feelings regarding issues of sexuality that may affect provider’s professional care of adolescents | disseminate information | **None** | mentors and teaches to improve quality of care |  |
| know where to find, access and handle local, national and international data to inform practice |  |  | Deliver services for adolescents in line with quality standards  - Practice according to biopsychosocial model |  |
| Professional (n=12) | Know the UN convention on the rights of a child | Explain confidential services - Determining patient's parental relationship during interview and physical examination | professional is self-aware | communicate effectively and maintain confidentiality |  |
| Know bioethics in ambiguous situations clinically and in public health | design QI to monitor adolescent services |  | mentors and teaches to improve quality of care |  |
| Mandated reporting | Apply step by step process to address ethical issues/dilemnas |  | works ethically and professionally   - Apply in clinical practice the laws and policies that affect adolescent health-care provision - Deliver services for adolescents in line with quality standards - use quality management processes and systems to optimize safety  - work within statuatory/ regulatory requirements |  |
| Juvenile justice | disseminate information |  |  |  |
